# Supplementary material for: HSPs drive dichotomous T-cell immune responses via DNA methylome remodelling in antigen presenting cells
Source: PubMed Central journal article supplement (PMC5460028; doi:10.1038/ncomms15648), 2017-05-31
Supplement: ncomms15648-s1.pdf [file ncomms15648-s1.pdf]

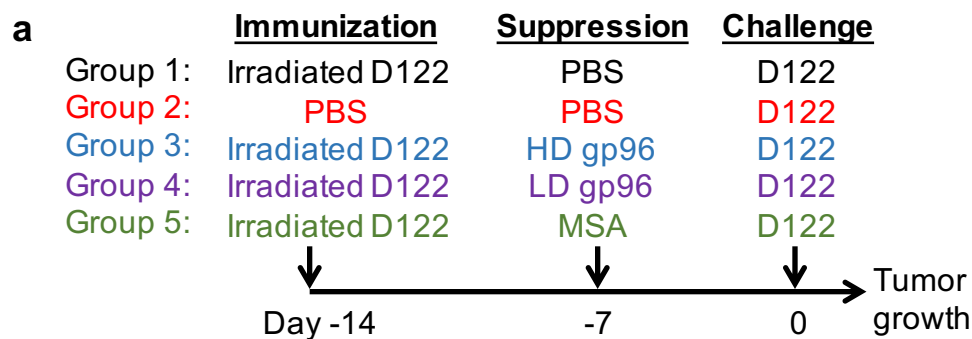

**b**

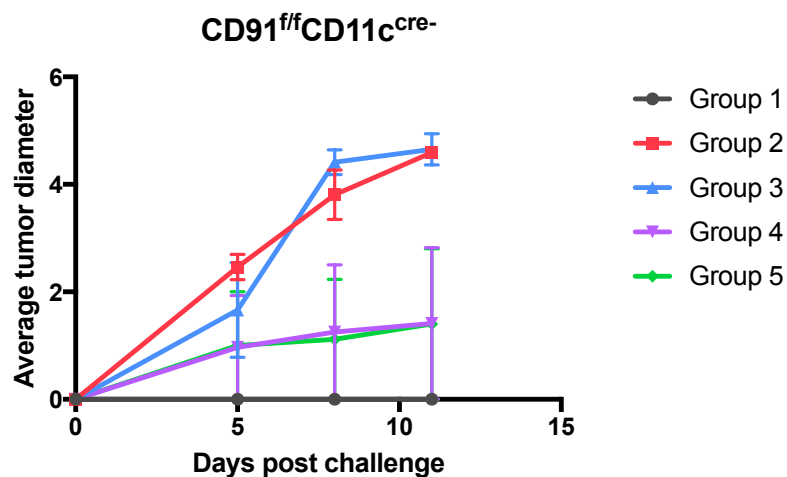

**c**

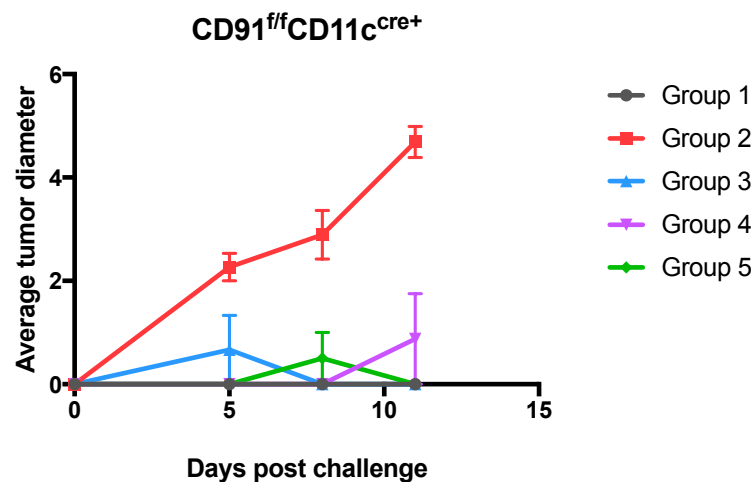

**Supplementary Figure 1. Gp96 elicits immune suppression at high dose but not low dose.** (a) Schema of experimental groups to test dose effects of gp96 on immune suppression. Mice were immunized with irradiated tumor cells and treated with low or high dose gp96 or with a control protein, mouse serum albumin, after 7 days. Immunity was measured by rejection of a tumor challenge on day 0. Tumor diameter was measured by two perpendicular axes using calipers. Tumor growth is shown for CD91<sup>ff</sup> (b) and CD91<sup>ff</sup>CD11c<sup>cre</sup> (c) mice. Data are represented as mean±s.e.m., n=5/group. HD=high dose, LD=low dose, MSA=mouse serum albumin

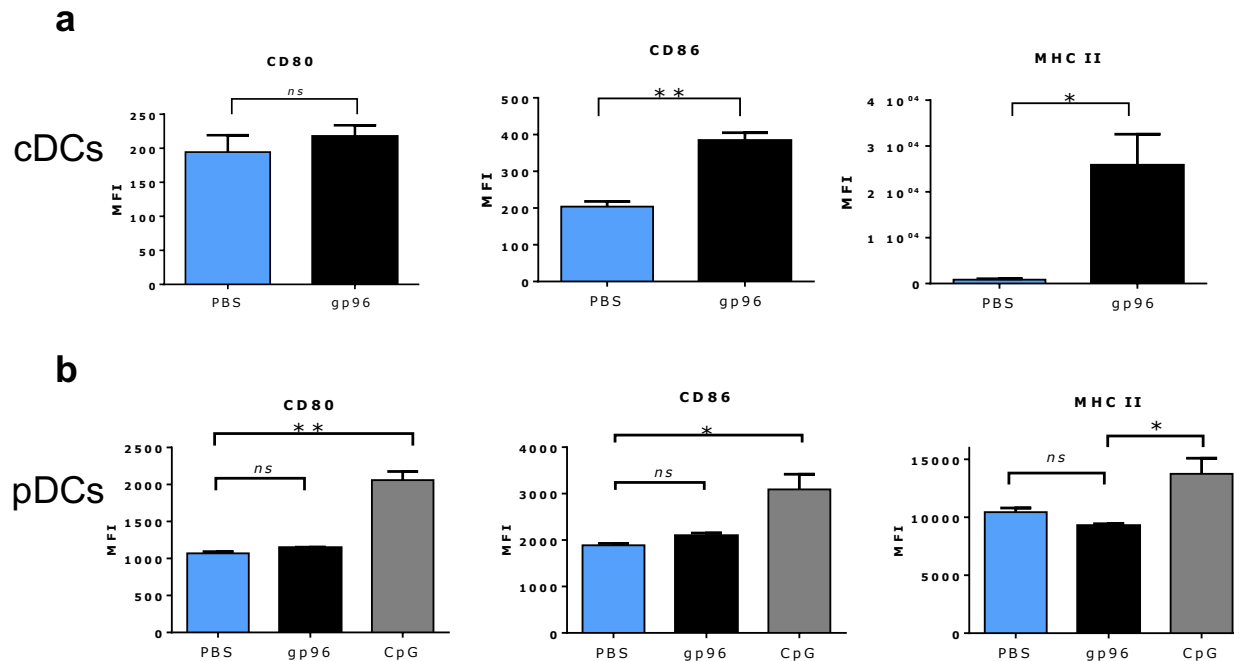

**Supplementary Figure 2. cDCs undergo maturation in response to gp96, whereas pDCs retain an immature phenotype.** cDCs (a) or pDCs (b) were stimulated with HD gp96 for 24 hours *in vitro* and then analyzed for maturation markers CD80, CD86, and MHC II by flow cytometry. CpG DNA-stimulated pDCs were included as a control for pDC maturation. Average MFI is shown for each marker. Data are represented as mean±s.d., n=3/group. ns not significant, \*P<0.05, \*\*P<0.01 (Student's t test used in panel a; one-way ANOVA used in panel b).

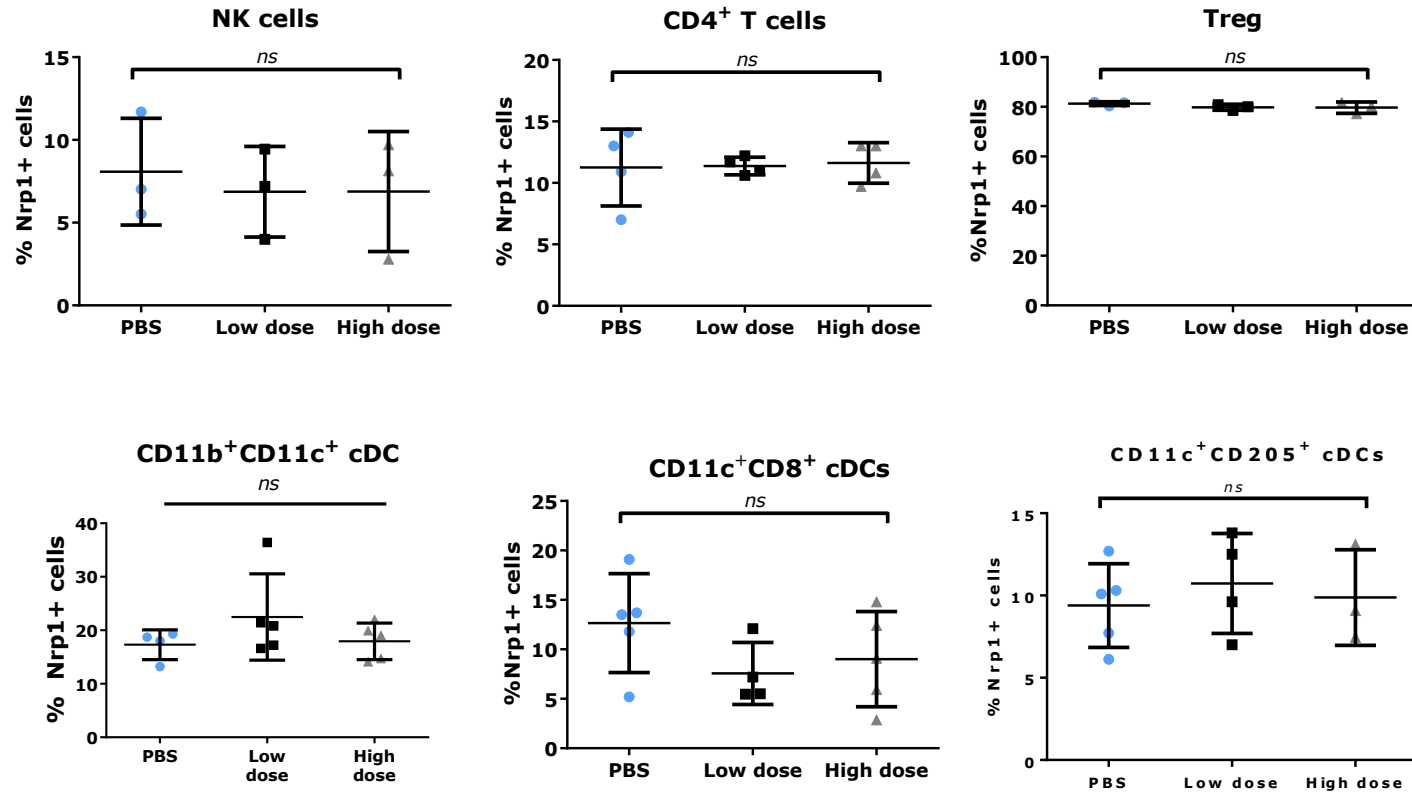

**Supplementary Figure 3. Cell surface Nrp1 expression does not change on majority of hematopoietic cells following gp96 immunization.** WT mice were immunized with LD or HD gp96 or given PBS. Lymph nodes were harvested after 18 hours and stained for NK cells (NK1.1), CD4<sup>+</sup> T cells (CD3, CD4), Treg (CD3, CD4, Foxp3), and DC subsets (CD11b, CD11c, CD8, CD205). Cells were analyzed for changes in percentage of Nrp1 expressed in respective gates. Data are represented as mean±s.d. *ns* not significant (one-way ANOVA).

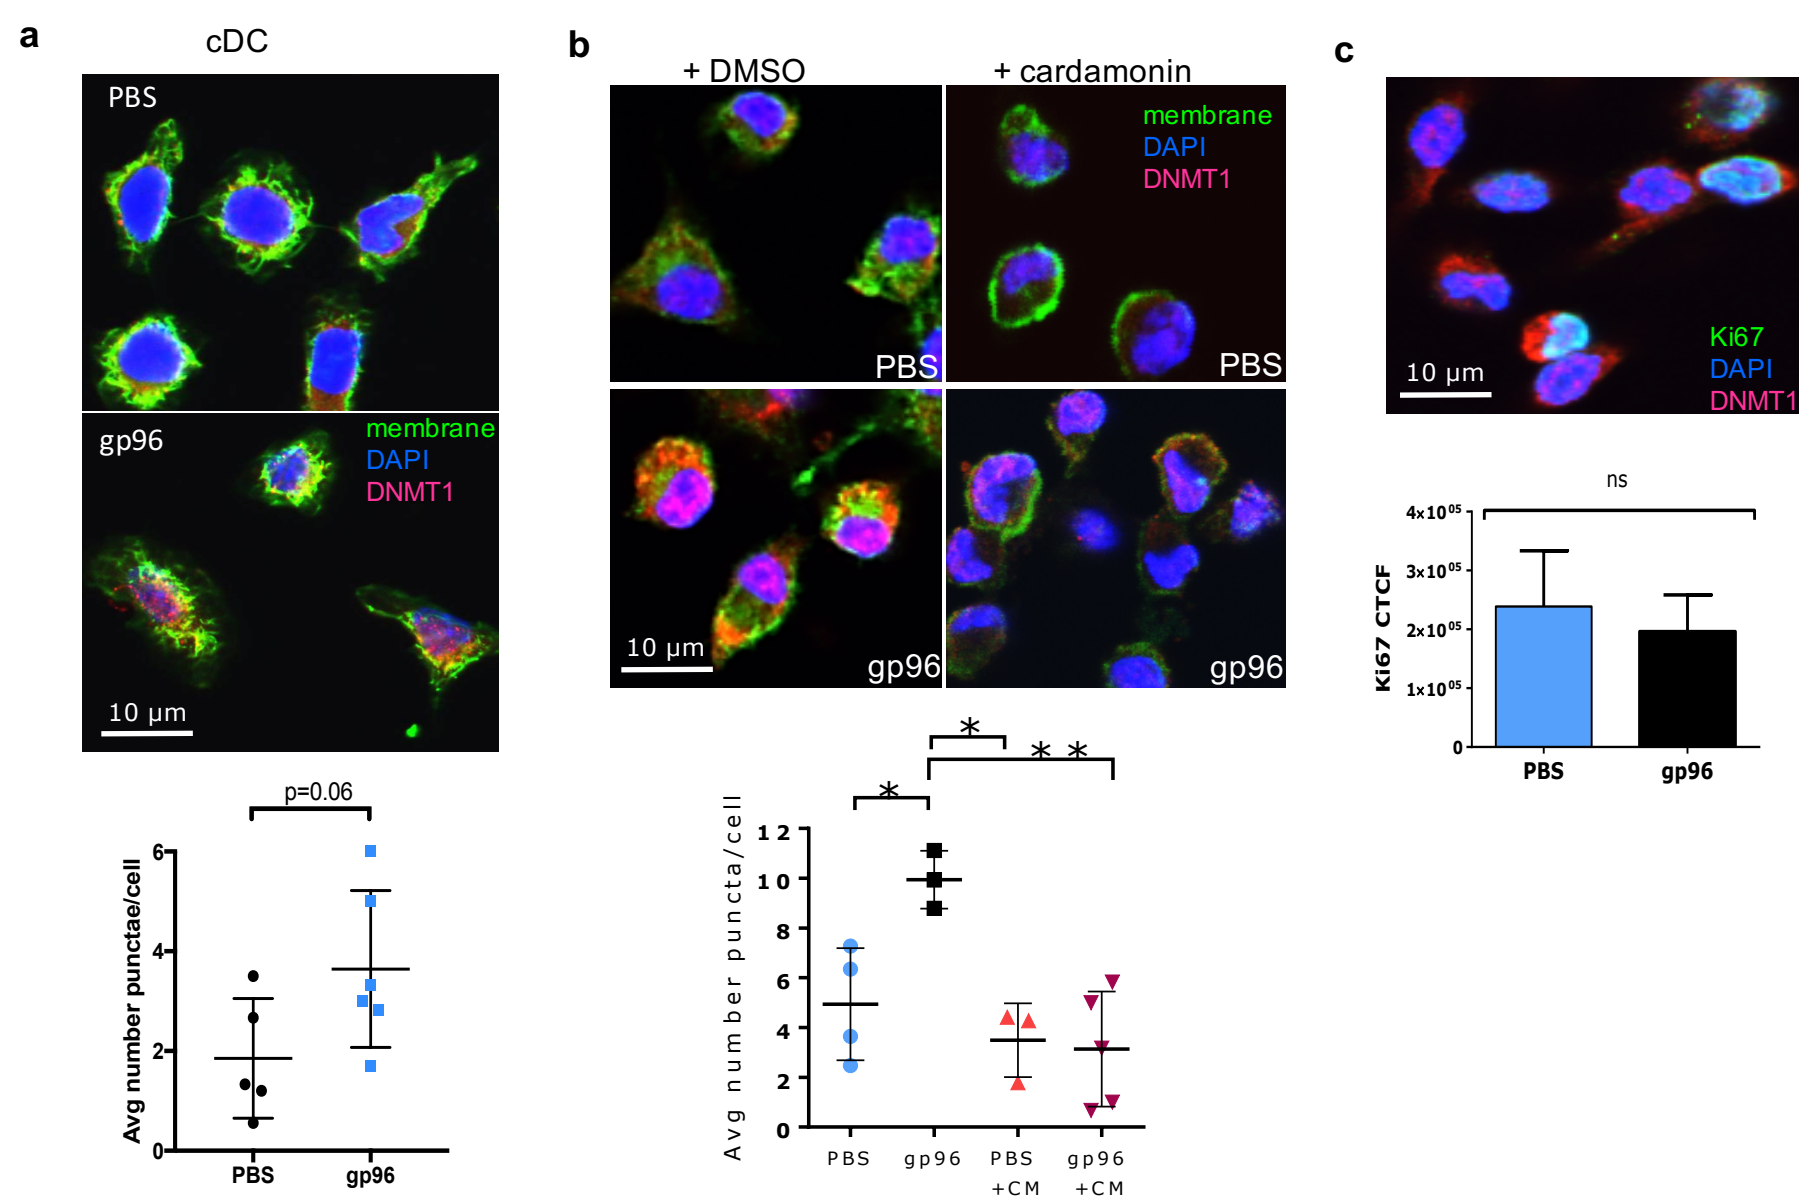

**Supplementary Figure 4. DNMT1 punctae formation in gp96-stimulated DCs is NF- $\kappa$ B dependent.** (a) Splenic cDCs were harvested from naïve mice, treated with HD gp96, and analyzed by confocal microscopy after 6 hr. DNMT punctae were quantified as described in Methods. (b) Cells were treated with HD gp96, in the presence of 10  $\mu$ M NF- $\kappa$ B inhibitor cardamomin (DMSO as negative control). DNMT1 punctae analysis was performed by confocal microscopy after 6 hr. (c) BMDCs were treated as in A and stained with DNMT1 and Ki67 antibodies to analyze Ki67 expression and location. Bar graphs on the right are the average of 2 experiments. Data are represented as mean  $\pm$  s.d. *ns* not significant, \**P* < 0.05, \*\**P* < 0.01 (Student's *t* test used in panels a and c; one-way ANOVA used in panel b).

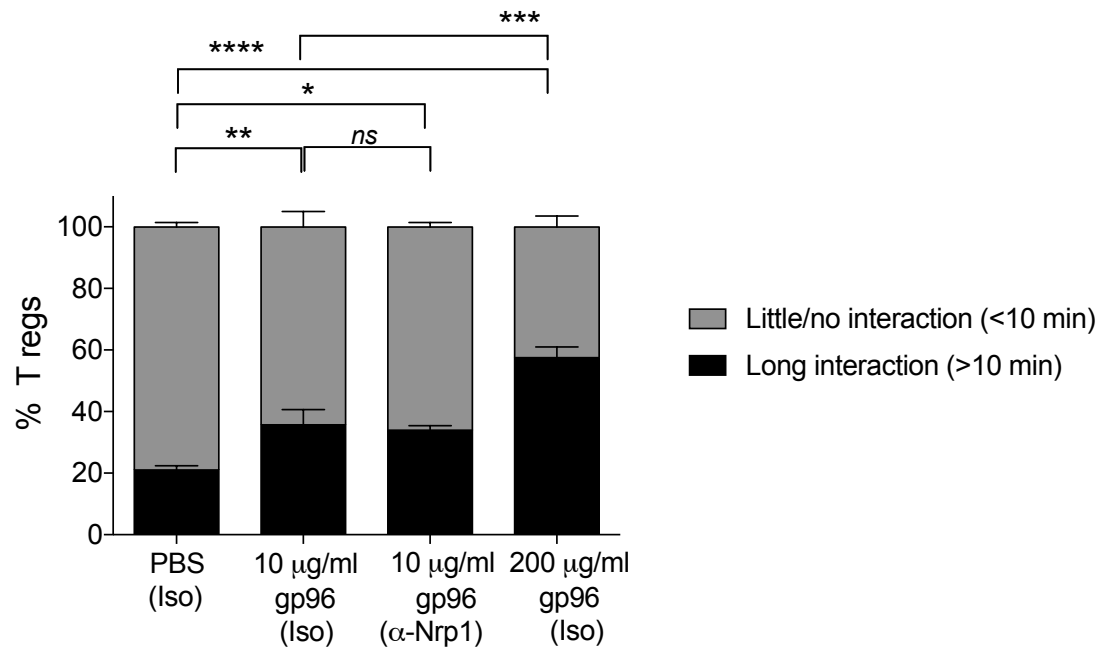

**Supplementary Figure 5. Duration of pDC-Treg interaction increases with increasing treatment dose of gp96.** pDCs were treated with low or high dose gp96 for 18 hr. As described in Methods, pDCs were also treated with a-Nrp1 blocking antibody or isotype control and co-cultured with labeled Treg. The percentage of cells which had undergone long term interactions in each group was calculated and is shown. Data are represented as mean±s.d. *ns* not significant, \**P*<0.05, \*\**P*<0.01, \*\*\**P*<0.001 versus control (ANOVA).

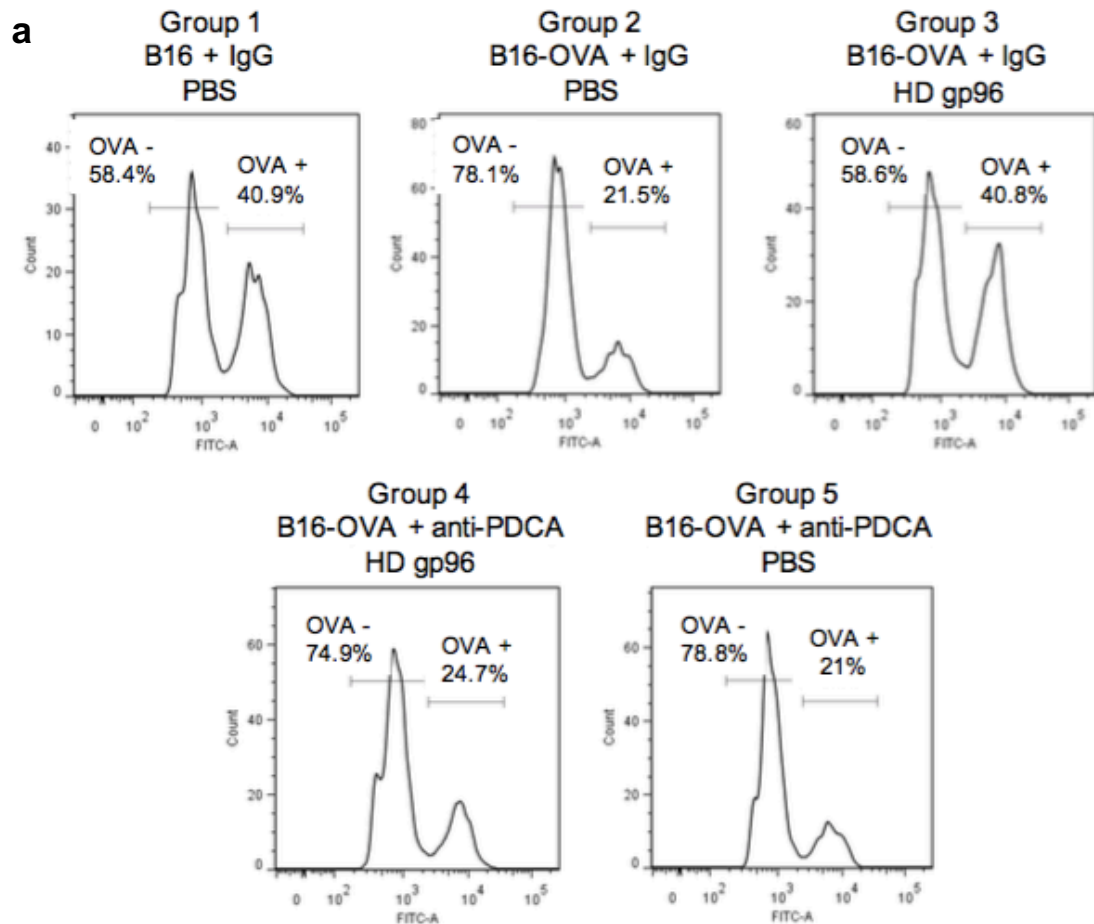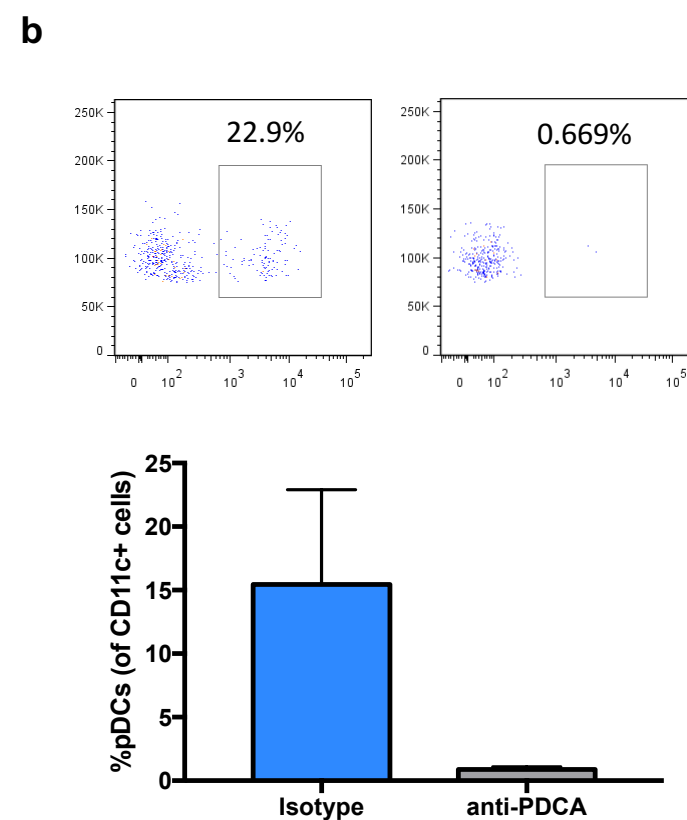

**Supplementary Figure 6. HD gp96 promotes suppression of anti-OVA CTL *in vivo* in a pDC-dependent manner.** (a) Shown are representative flow plots for CFSE-labeled SIINFEKL-pulsed target splenocytes (CFSE-high) and unpulsed non-target splenocytes (CFSE-low) for each treatment group in Figure 7A. (b) Mice were treated with a-PDCA depleting antibody or isotype control antibody i.p. (400  $\mu$ g/mouse). pDC depletion was monitored in blood 24 hr later by flow cytometry. Data are represented as mean  $\pm$  s.d.

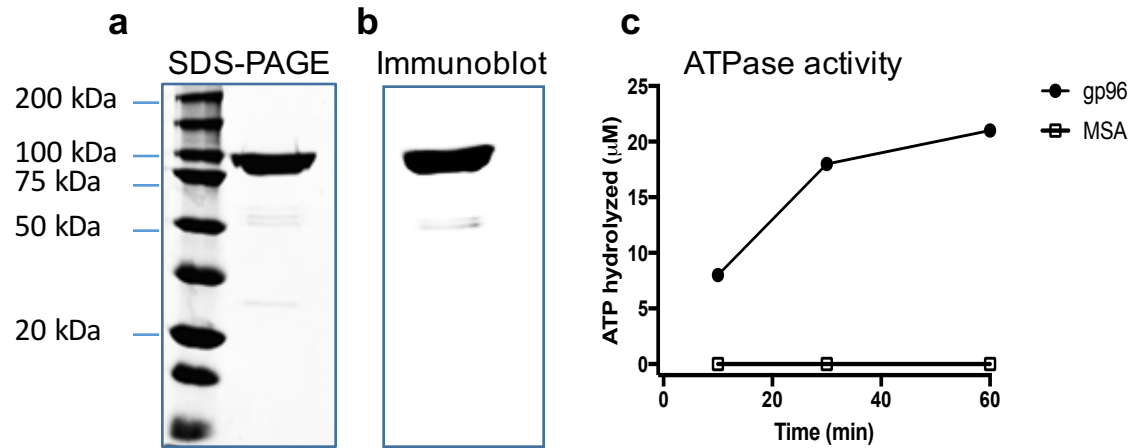

**Supplementary Figure 7. Characterization of purified murine gp96.** Gp96 preparations were tested for purity and biochemical activity to ensure quality of protein. **(a-b)** gp96 was analyzed by 10% SDS-PAGE following staining with Coomassie blue, and by immunoblotting with a gp96 specific monoclonal antibody. **(c)** ATP hydrolysis by gp96 was assessed. Gp96 was incubated at 37°C for indicated time period with ATP. Following addition of malachite green,  $\mu\text{M}$  ATP hydrolyzed was calculated from a standard curve. MSA was used as a negative control.

### a Gating of pDCs and cDCs

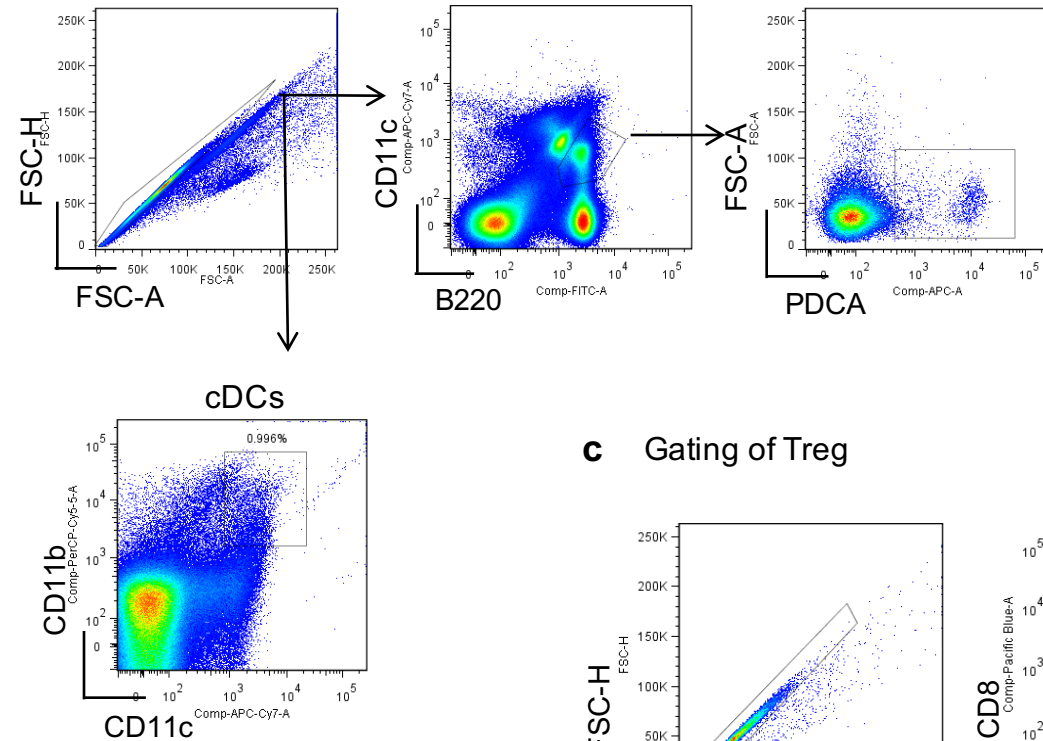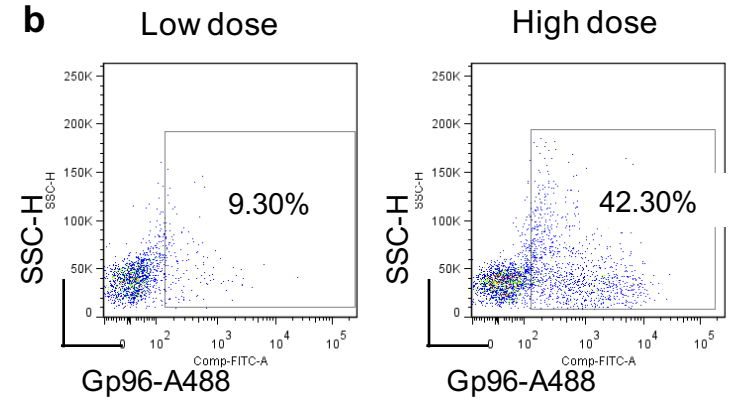

### c Gating of Treg

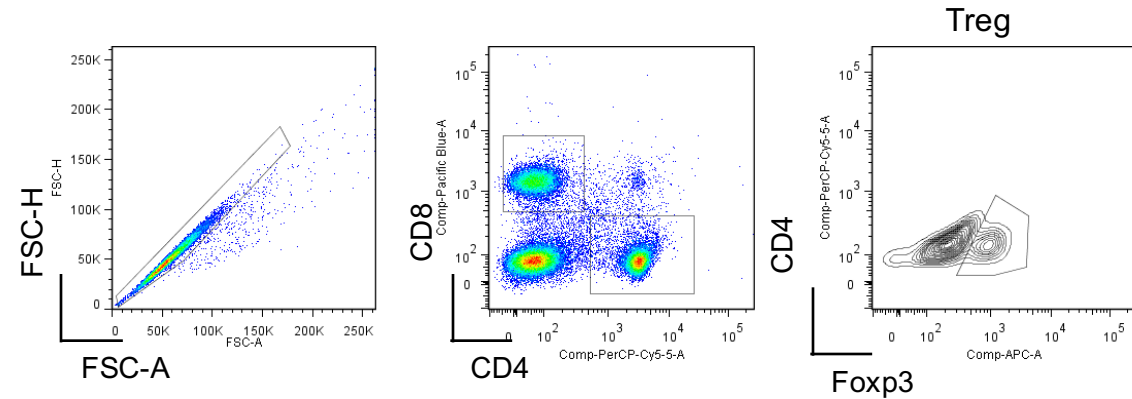

**Supplementary Figure 8. Flow cytometry gating strategy for pDCs, cDCs, and T cells.** Gating strategy for cell types identified throughout manuscript. (a) pDCs were identified by expression of CD11c (intermediate), B220, and PDCA. cDCs were identified by expression of CD11c and CD11b. (b) Using a similar gating strategy shown in (a), gp96<sub>A488</sub> positive cells were identified by FITC fluorescence. (c) Treg were identified by expression of CD4 and Foxp3.



---

| <b>Sample</b> | <b>Total Reads</b> | <b>Filtered Reads</b> | <b>% Lost</b> | <b>% Mapped</b> | <b># Mapped</b> |
|---------------|--------------------|-----------------------|---------------|-----------------|-----------------|
| PBS           | 36439249           | 6737640               | 18.49         | 99.51           | 6704382         |
| Low dose      | 46698860           | 7339383               | 15.72         | 99.57           | 7307944         |
| High dose     | 55685332           | 11229658              | 20.17         | 99.65           | 11190094        |

---

**Supplementary Table 1. Methyl-seq sample mapping statistics**

## HD&gt; LD (29 targets)

| Gene name | Aliases     | RefSeq accession | Chromosome | Peak start | Peak end  | HD coverage+ | LD coverage+ | Delta (HD-LD)† | APC expression (Immgen)          | Published works on DC-T cell interaction                  |
|-----------|-------------|------------------|------------|------------|-----------|--------------|--------------|----------------|----------------------------------|-----------------------------------------------------------|
| Magi2     | ACVRI1      | NM_001170746     | chr5       | 18985287   | 18985930  | 706.93       | 290.78       | 416.15         | -                                | -                                                         |
| Anks1b    | AIDA-1B     | NM_001128086     | chr10      | 89716364   | 89717299  | 829.69       | 456.22       | 373.47         | -                                | -                                                         |
| Cep128    |             | NM_181815        | chr12      | 92462122   | 92462553  | 413.38       | 56.47        | 356.91         | cDC, pDC, mo                     | -                                                         |
| ApoI      | Mic27       | NM_026565        | chrX       | 109482705  | 109483140 | 428.42       | 94.6         | 333.82         | cDC, pDC, mac                    | -                                                         |
| Adamts3   |             | NM_001190374     | chr7       | 89618915   | 89619291  | 467.33       | 157.3        | 310.03         | -                                | -                                                         |
| Smo       |             | NM_176996        | chr6       | 29697352   | 29699387  | 534.21       | 295.08       | 239.13         | mo, LC, mac                      | -                                                         |
| Nlgn1     | NL1         | NM_001163387     | chr3       | 25820638   | 25821459  | 437.08       | 216.12       | 220.96         | cDC, mo LC, mac                  | -                                                         |
| Pisc-ps2  |             | NR_003519        | chr17      | 3081229    | 3083292   | 552.73       | 375.78       | 176.95         | cDC, pDC, mo LC, mac             | -                                                         |
| Maoa      |             | NM_173740        | chrX       | 16247784   | 16248261  | 242.09       | 103.15       | 138.94         | LC, mac                          | -                                                         |
| Unc13c    |             | NM_001081153     | chr9       | 73675204   | 73675598  | 320.61       | 195.01       | 125.6          | -                                | -                                                         |
| Gstcd     |             | NM_026231        | chr3       | 132728372  | 132728926 | 196.14       | 93.23        | 102.91         | cDC, mac                         | -                                                         |
| Bmper     | CRIM3       | NM_028472        | chr9       | 23094351   | 23094641  | 101.46       | 0            | 101.46         | cDC, pDC                         | -                                                         |
| Olfir593  |             | NM_146380        | chr7       | 110358292  | 110358906 | 255.6        | 156.56       | 99.04          | -                                | -                                                         |
| Gphn      |             | NM_145965        | chr12      | 79375574   | 79376162  | 256.73       | 160.44       | 96.29          | cDC, pDC, mo LC, mac             | -                                                         |
| Gtf2h2    |             | NM_022011        | chr13      | 101241094  | 101241462 | 161.11       | 68.55        | 92.56          | cDC, pDC, mo LC, mac             | -                                                         |
|           | STN2, STN B |                  |            |            |           |              |              |                |                                  |                                                           |
| Ston2     |             | NM_175367        | chr12      | 92981055   | 92982529  | 86.76        | 0            | 86.76          | cDC, mac                         | -                                                         |
| Meis1     |             | NM_010789        | chr11      | 18852461   | 18852694  | 81.39        | 0            | 81.39          | cDC, pDC, mo LC, mac             | -                                                         |
| Gpr98     | ADGRV1      | NM_054053        | chr13      | 81551933   | 81552441  | 77.93        | 0            | 77.93          | -                                | -                                                         |
| Myo3b     |             | NM_177376        | chr2       | 69875218   | 69875746  | 76.25        | 0            | 76.25          | -                                | -                                                         |
| Cpxm2     |             | NM_018867        | chr7       | 139307057  | 139307716 | 76.23        | 0            | 76.23          | LC                               | -                                                         |
| Wdttc1    | DCAF9       | NM_199306        | chr4       | 132873894  | 132874522 | 75.33        | 0            | 75.33          | cDC, pDC, mo LC, mac             | -                                                         |
| Gabbr2    |             | NM_001081141     | chr4       | 46807144   | 46807883  | 74.68        | 0            | 74.68          | cDC, pDC, mo LC, mac             | -                                                         |
| Cdhr3     |             | NM_001024478     | chr12      | 33760550   | 33761112  | 73.54        | 0            | 73.54          | cDC                              | -                                                         |
| Nrp1      | CD304       | NM_008737        | chr8       | 130909774  | 130910078 | 72.41        | 0            | 72.41          | cDC (low), pDC (high), mo (high) | Sarris et al, 2008; Tordjmann et al; Delgoffe et al, 2014 |
| Ccl11     | Eotaxin-1   | NM_011330        | chr11      | 81877343   | 81877624  | 72.41        | 0            | 72.41          | cDC, pDC, mo LC, mac             | -                                                         |
| Shroom3   | APXL3       | NM_015756        | chr5       | 93190064   | 93190518  | 72.13        | 0            | 72.13          | cDC, pDC, mo LC, mac             | -                                                         |
| Nell1     |             | NM_001037906     | chr7       | 57580690   | 57580936  | 61.26        | 0            | 61.26          | -                                | -                                                         |
| Kctd16    | M-EAG       | NM_026135        | chr18      | 40538033   | 40538370  | 61.26        | 0            | 61.26          | -                                | -                                                         |
| Kcnn1     |             | NM_001038607     | chr1       | 194023294  | 194023710 | 173.55       | 113.32       | 60.23          | LC                               | -                                                         |

## LD&gt; HD (26 targets)

| Gene name | Aliases    | RefSeq accession | Chromosome | Peak start | Peak end  | HD coverage+ | LD coverage+ | Delta (HD-LD)† | APC expression (Immgen) | Published works on DC-T cell interaction |
|-----------|------------|------------------|------------|------------|-----------|--------------|--------------|----------------|-------------------------|------------------------------------------|
| Fam172a   |            | NM_138312        | chr13      | 77919765   | 77920290  | 367.91       | 742.72       | -374.81        | cDC, pDC, mo LC, mac    | -                                        |
| Tbc1d9    | MDR1       | NM_001111304     | chr8       | 85752214   | 85755805  | 94.18        | 401.81       | -307.63        | cDC, mo, LC, mac        | -                                        |
| Hpsc2     | UFS        | NM_001081257     | chr19      | 43313714   | 43314089  | 764.69       | 1053.75      | -289.06        | -                       | -                                        |
| Sgcz      |            | NM_145841        | chr8       | 38696342   | 38696718  | 367.91       | 648.16       | -280.25        | -                       | -                                        |
| Tmem232   |            | NM_001008973     | chr17      | 65629264   | 65629806  | 154.26       | 362.48       | -208.22        | -                       | -                                        |
| Stam2     | HBP        | NM_019667        | chr2       | 52551744   | 52558220  | 0            | 163.43       | -163.43        | cDC, pDC, mo LC, mac    | -                                        |
| Dach2     |            | NM_001142570     | chrX       | 110665377  | 110665793 | 53.44        | 207.81       | -154.37        | -                       | -                                        |
| Tmem132c  |            | NM_175432        | chr5       | 127752052  | 127752513 | 171.25       | 323.82       | -152.57        | cDC                     | -                                        |
| Col19a1   |            | NM_007733        | chr1       | 24452000   | 24452373  | 146.76       | 297.98       | -151.22        | -                       | -                                        |
| Pik3c2g   |            | NM_207683        | chr6       | 139870145  | 139870612 | 77.18        | 228.28       | -151.1         | -                       | -                                        |
| Itgb1     |            | NM_145467        | chr14      | 124343810  | 124344457 | 197.85       | 347.7        | -149.85        | -                       | -                                        |
| Nbea      | LYST2      | NM_030595        | chr3       | 55924530   | 55925050  | 246.34       | 393.42       | -147.08        | cDC, pDC, mo, mac       | -                                        |
| Unc80     |            | NM_175510        | chr1       | 66728690   | 66729004  | 56.57        | 196.22       | -139.65        | -                       | -                                        |
| Klra2     | Ly49b      | NM_001170851     | chr6       | 131177385  | 131177785 | 101.61       | 234.86       | -133.25        | mo, mac                 | -                                        |
| Sntg1     | SYN4       | NM_027671        | chr1       | 8708056    | 8708514   | 166.38       | 297.98       | -131.6         | -                       | -                                        |
| Cntn5     | NB2        | NM_001033359     | chr9       | 10173900   | 10174397  | 131.91       | 242.32       | -110.41        | -                       | -                                        |
| Pip5k1a   |            | NM_008847        | chr3       | 94896304   | 94896722  | 0            | 109.78       | -109.78        | cDC, pDC, mo LC, mac    | -                                        |
| Lama2     |            | NM_008481        | chr10      | 27302267   | 27302697  | 0            | 108.28       | -108.28        | -                       | -                                        |
| Inpp5a    |            | NM_001127363     | chr7       | 146703630  | 146703951 | 0            | 107.37       | -107.37        | cDC, pDC, mo LC, mac    | -                                        |
| Gabrg3    |            | NM_008074        | chr7       | 64227382   | 64227879  | 380.3        | 482.22       | -101.92        | cDC, mac                | -                                        |
| Kir3dl1   | NKB1       | NM_177749        | chrX       | 133051381  | 133052112 | 367.63       | 468.62       | -100.99        | -                       | -                                        |
| Ube2e2    |            | NM_144839        | chr14      | 19535822   | 19536247  | 374.14       | 461.11       | -86.97         | cDC, LC, mac            | -                                        |
| Ncam1     | CD56       | NM_001113204     | chr9       | 49463833   | 49464363  | 0            | 86.52        | -86.52         | mac                     | -                                        |
| Cadps2    |            | NM_001252105     | chr6       | 23410121   | 23410681  | 0            | 73.7         | -73.7          | mac                     | -                                        |
| Ctnd2     | NPRAP      | NM_008729        | chr15      | 30589483   | 30589996  | 0            | 67.3         | -67.3          | cDC, pDC, LC            | -                                        |
|           | FOX1, A2BP |                  |            |            |           |              |              |                |                         |                                          |
| Rbfox1    |            | NM_021477        | chr16      | 7242782    | 7243199   | 0            | 64.83        | -64.83         | cDC, pDC, mo LC, mac    | -                                        |

**Supplementary Table 2. List of methyl-seq DMRs.** Gene names and RefSeq accession numbers of all intragenic DMRs are provided along with chromosome location and start/end location of detected peaks. Each gene was also compared to the Immgen database for expression in various APC types and listed accordingly. † : Coverage values reflect the relative abundance of reads at a given region. For coding genes, this reflects the average coverage of the total sum of exons. † † : Delta is the difference between high dose and low dose coverage values. cDC=conventional DC, pDC=plasmacytoid DC, LC=Langerhans cell, mo=monocytic, mac=macrophage, HD=high dose, LD=low dose.

| <b>HD&gt;LD</b>                       |             |                     |                        |                                                                                                          |
|---------------------------------------|-------------|---------------------|------------------------|----------------------------------------------------------------------------------------------------------|
| <b>Subcategory name</b>               | <b>pval</b> | <b>neg log pval</b> | <b>number of genes</b> | <b>GeneIDs</b>                                                                                           |
| Cell adhesion                         | 0.000120361 | 3.919514213         | 6                      | Nlgn1, Gpr98, Cpxm2, Cdhr3, Nell1, Nrp1                                                                  |
| Cell junction                         | 0.000136725 | 3.864152068         | 7                      | Nlgn1, Gphn, Anks1b, Unc13c, Dennd1a, Gabbr2, Shroom3                                                    |
| Synapse                               | 0.000286469 | 3.542922368         | 6                      | Nlgn1, Gphn, Anks1b, Unc13c, Dennd1a, Gabbr2                                                             |
| Cell projection                       | 0.00258205  | 2.588035352         | 5                      | Smo, Anks1b, Dennd1a, Gabbr2, Nrp1                                                                       |
| Cell-cell adhesion                    | 0.0077048   | 2.11323863          | 3                      | Nlgn1, Gpr98, Cdhr3                                                                                      |
| Protein binding                       | 0.00280261  | 2.552437333         | 20                     | Magi2, Kctd16, Nlgn1, Gpr98, Gstd, Gphn, Bmper, Ston2, Meis1, Myo3b, Dennd1a, Wdtd1, Nell1, Gabbr2, Nrp1 |
| Postsynaptic membrane                 | 0.000966876 | 3.01462922          | 4                      | Nlgn1, Gphn, Anks1b, Gabbr2                                                                              |
| Cell communication                    | 0.00914359  | 2.038883256         | 6                      | Smo, Nlgn1, Gpr98, Maa, Unc13c, Bmper                                                                    |
| Cell-cell signaling                   | 0.00918952  | 2.036707173         | 4                      | Smo, Nlgn1, Maa, Unc13c                                                                                  |
| Synaptic transmission                 | 0.0351746   | 1.453770833         | 3                      | Nlgn1, Maa, Unc13c                                                                                       |
| Signaling                             | 0.0486346   | 1.313054652         | 10                     | Smo, Magi2, Nlgn1, Gpr98, Maa, Olfr593, Unc13c, Bmper, Gabbr2, Nrp1                                      |
| Regulation of developmental process   | 0.00149985  | 2.823952173         | 7                      | Smo, Nlgn1, Meis1, Nell1, Nrp1, Ccl11, Shroom3                                                           |
| Anatomical structure development      | 0.0077048   | 2.11323863          | 10                     | Smo, Nlgn1, Gpr98, Gphn, Bmper, Meis1, Nell1, Nrp1, Ccl11, Shroom3                                       |
| Growth                                | 0.0297471   | 1.526555367         | 4                      | Smo, Wdtd1, Nrp1, Ccl11                                                                                  |
| Vasculature development               | 0.0332004   | 1.478856684         | 4                      | Smo, Meis1, Nrp1, Ccl11                                                                                  |
| Angiogenesis                          | 0.0494972   | 1.305419368         | 3                      | Meis1, Nrp1, Ccl11                                                                                       |
| <b>LD&gt;HD</b>                       |             |                     |                        |                                                                                                          |
| <b>Subcategory name</b>               | <b>pval</b> | <b>neg log pval</b> | <b>number of genes</b> | <b>GeneIDs</b>                                                                                           |
| Inositol phosphate metabolism         | 0.0188722   | 1.72417747          | 3                      | Pip5k1a, Inpp5a, Pik3c2g                                                                                 |
| Phosphatidylinositol signaling        | 0.0245305   | 1.6102936           | 3                      | Pip5k1a, Inpp5a, Pik3c2g                                                                                 |
| Phosphatidylinositol phosphate kinase | 0.0439244   | 1.357294162         | 2                      | Pip5k1a, Pik3c2g                                                                                         |
| Cell adhesion                         | 0.05073     | 1.294735138         | 5                      | Ncam1, Ptprm, Lama2, Cntn5, Krla2, Col19a1, Ctnnd2                                                       |
| Biological adhesion                   | 0.05073     | 1.294735138         | 7                      | Ptprm, Lama2, Negr1, Cntn5, Krla2, Col19a1, Ctnnd2                                                       |

**Supplementary Table 3. List of gene ontology (GO) analysis hits.** All intragenic DMRs were submitted for GO analysis using Genetrait using parameters listed in Methods. Subcategories of gene families associated with gene that had increased methylation in high dose (HD>LD) or low dose (LD>HD) are listed and p-values (Pvals) for each are provided. LD=low dose, HD=high dose
